# Supplementary material for: Two-dimensional GaN/Si heterojunctions towards high-performance UV-B photodetectors
Source: Royal Society of Chemistry journal article supplement (doi:10.1039/d4mh01899k), 2025-01-01
Supplement: d4mh01899k1.pdf [file d4mh01899k1.pdf]

## Supporting Information

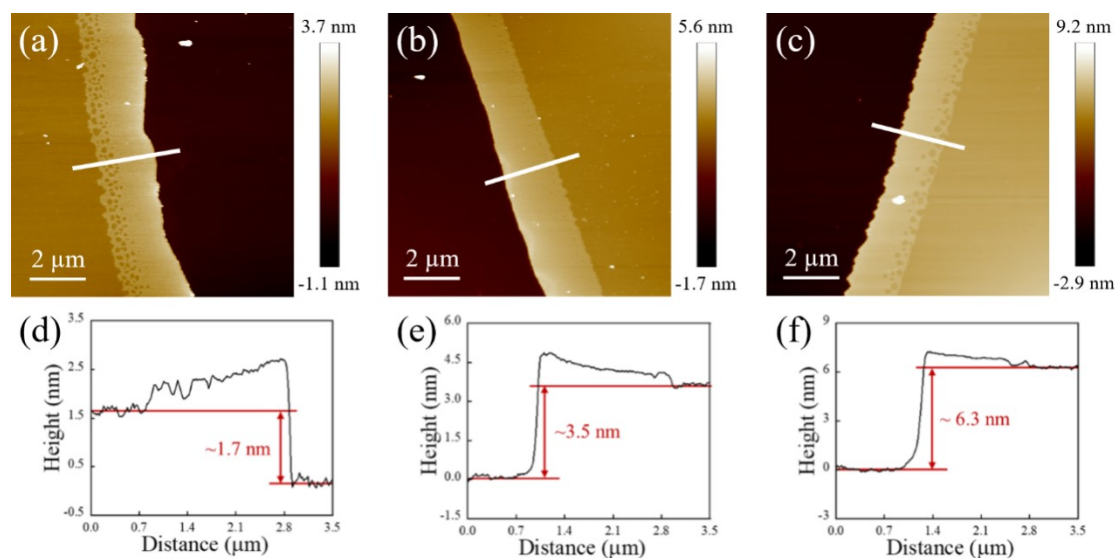

**Fig. S1** AFM images of sputtered  $\text{Ga}_2\text{O}_3$  with sputtering time of a) 25, b) 50 and c) 100 seconds. d) - e) Thickness profiles obtained from images a-c along the white lines.

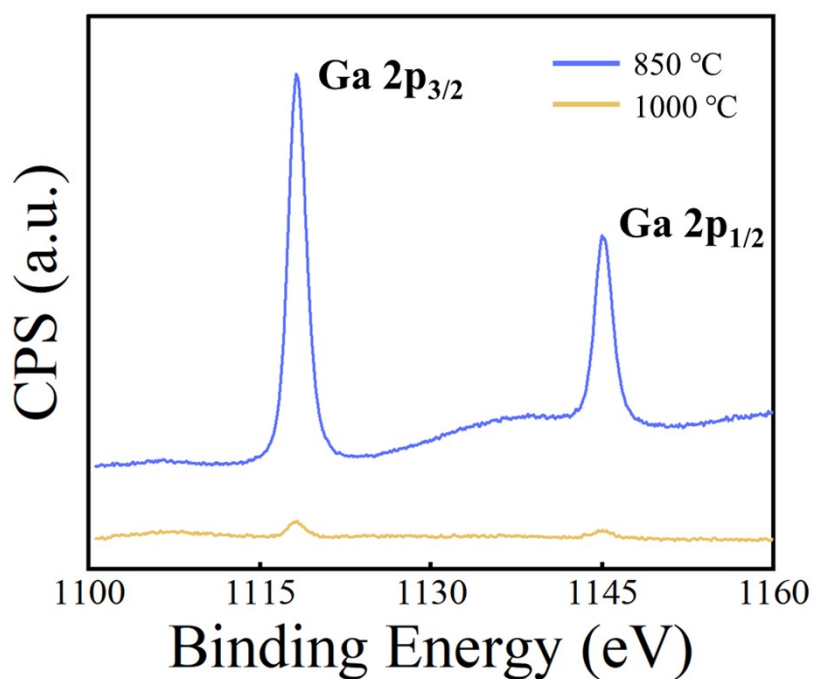

**Fig. S2** Ga 2p XPS spectra of 2D GaN with ammonolysis temperature of 850 and 1000  $^{\circ}\text{C}$ .

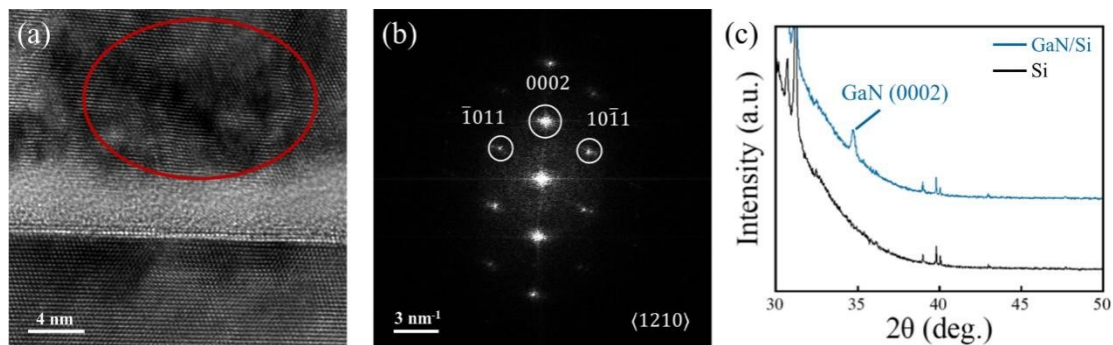

**Fig. S3** a) HRTEM image of thick GaN synthesized *via* two-step method and b) the corresponding SAED pattern. c) XRD patterns of as fabricated GaN/Si heterojunction and Si substrate.

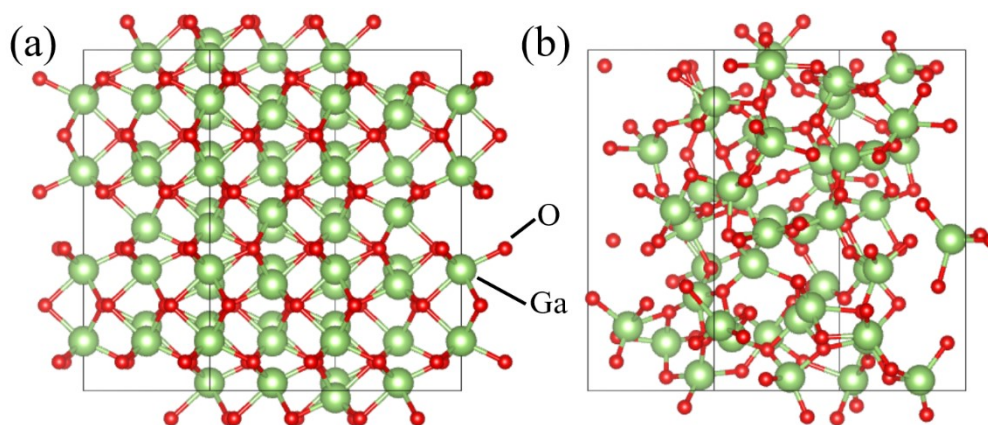

**Fig. S4** Illustrations of a)  $\gamma$ -Ga<sub>2</sub>O<sub>3</sub> and b) amorphous Ga<sub>2</sub>O<sub>3</sub>.

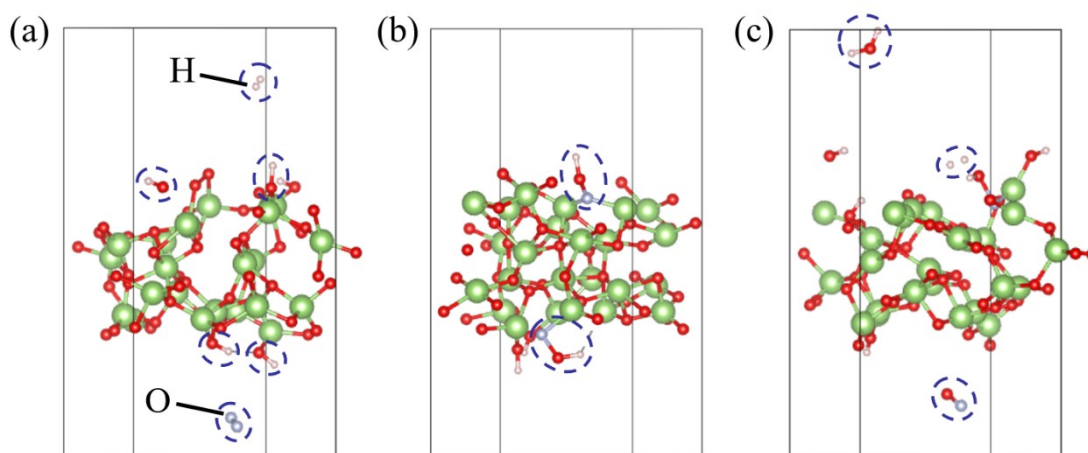

**Fig. S5** Atomic models for the calculation results of the reaction between Ga<sub>2</sub>O<sub>3</sub> and ammonia.

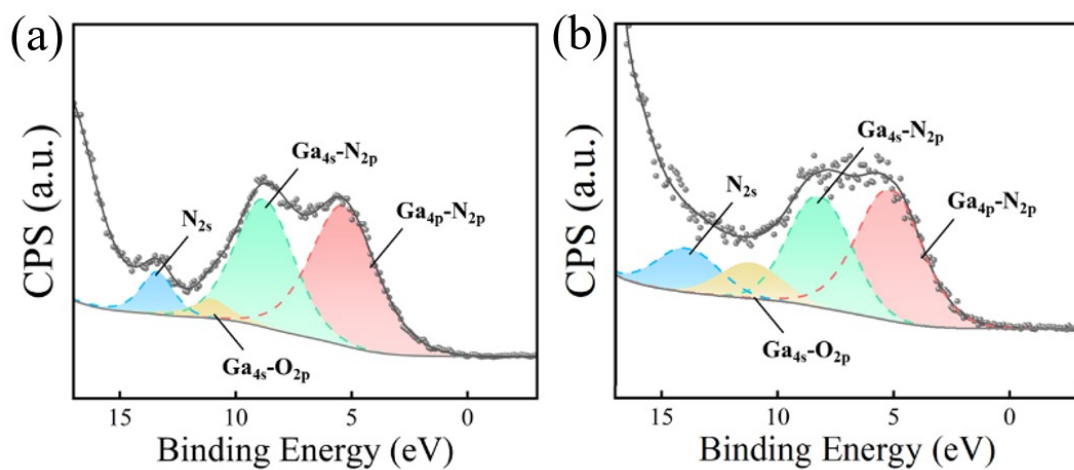

**Fig. S6** XPS valence band spectra of a) 2D GaN/Si heterojunction, b) 2D GaN/SiO<sub>2</sub>/Si heterojunction.

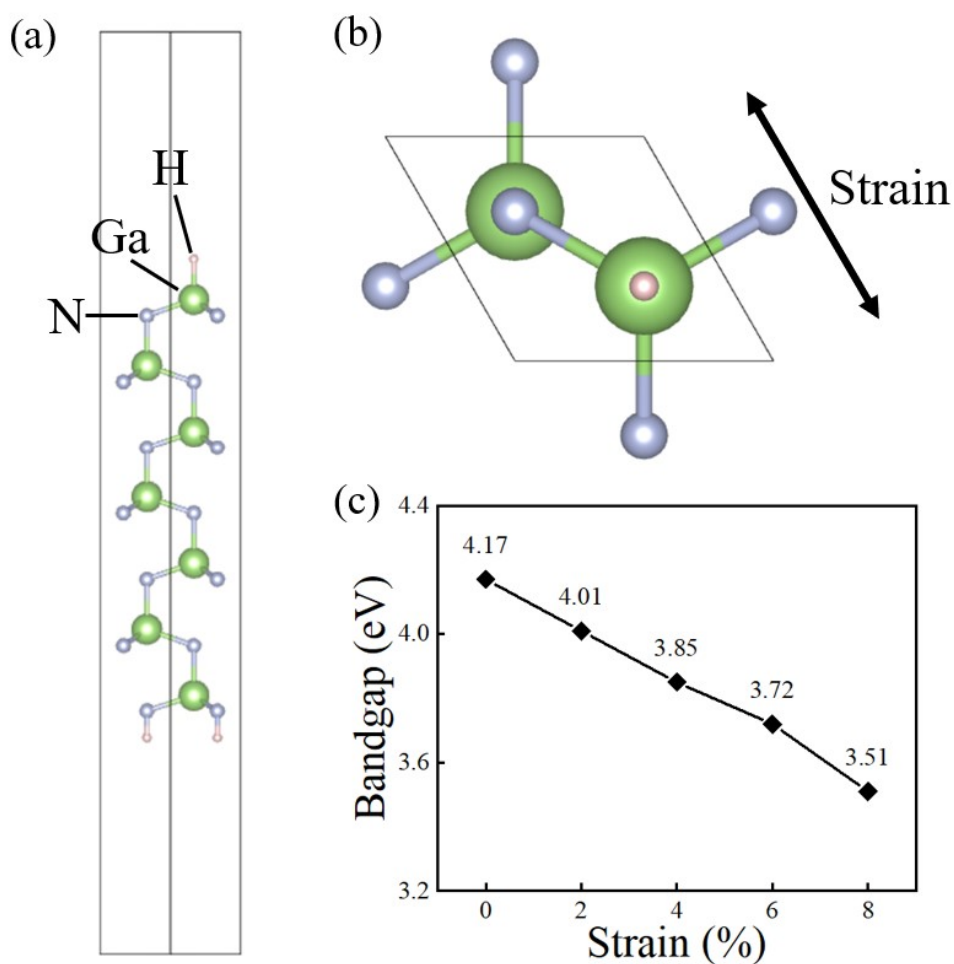

**Fig. S7** a) and b) Model of 2D GaN used for DFT calculations. c) Calculated bandgap of 2D GaN as a function of in-plane strain

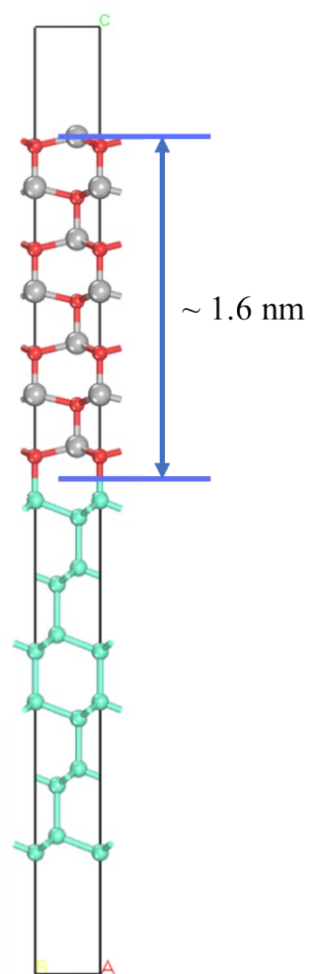

**Fig. S8** Model of 2D GaN/Si heterojunction used for DFT calculations.

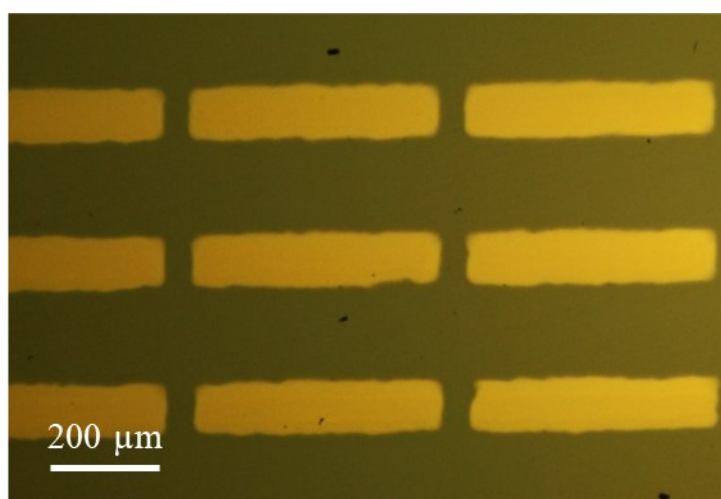

**Fig. S9** Optical microscope image of 2D GaN/Si UV-B photodetectors.

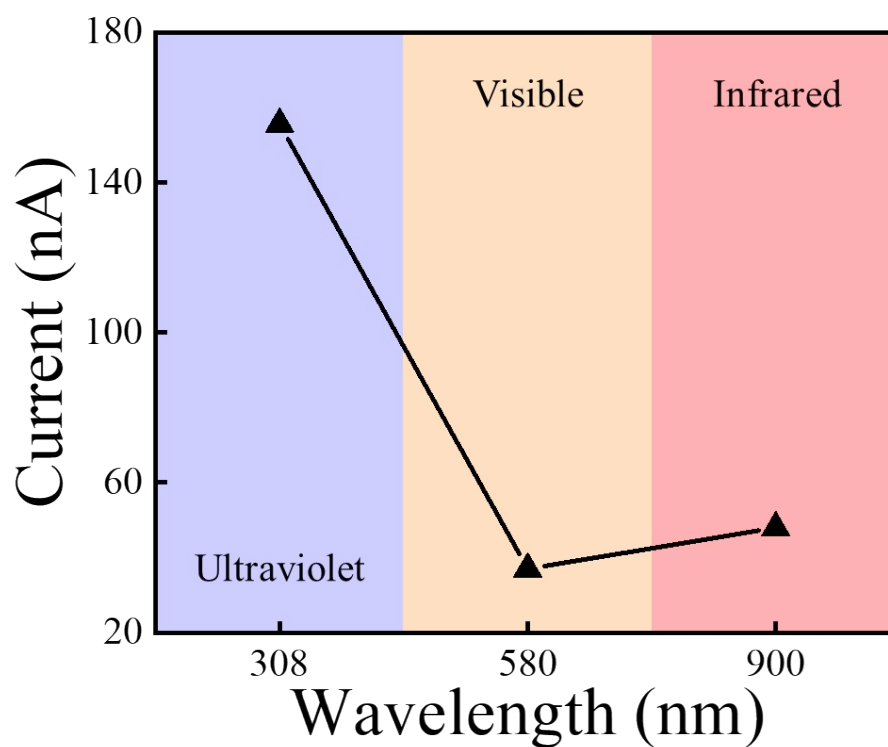

**Fig. S10** Photocurrents of 2D GaN/Si PDs for incident light wavelengths of 308, 580 and 900 nm.

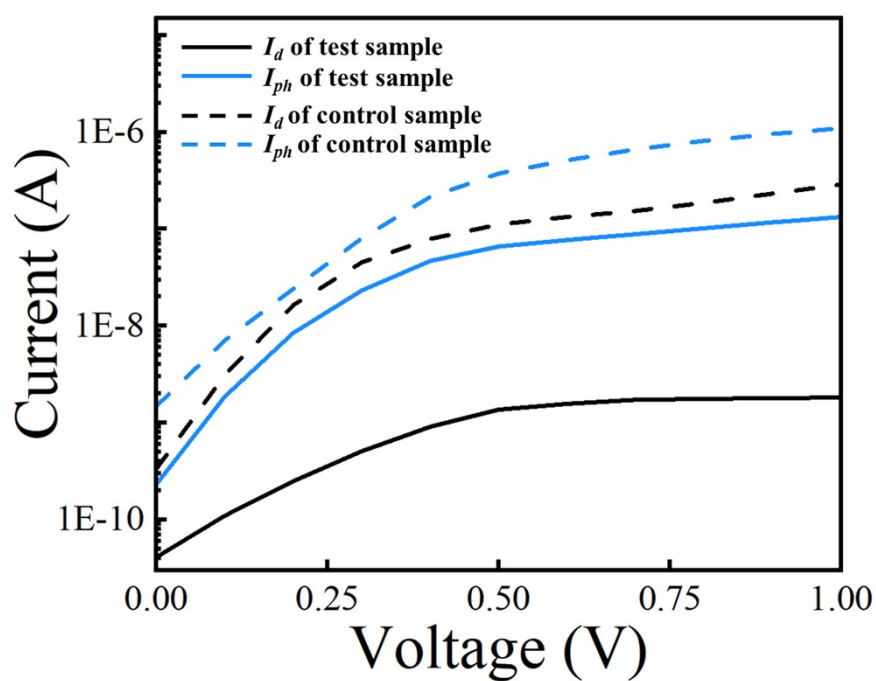

**Fig. S11** I-V curves of test and control samples under dark and 308 nm laser illumination with light intensity of 3.667 mW.

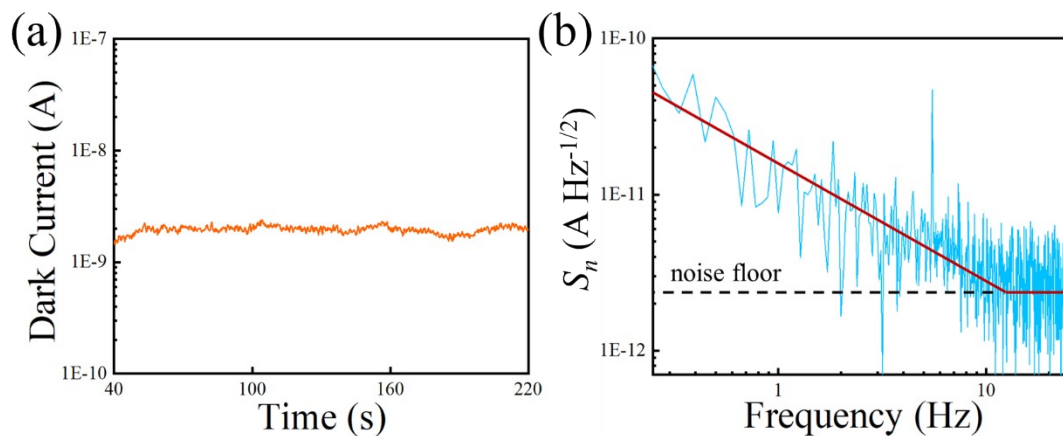

**Fig. S12** a) Dark Current traces as a function of time at  $V = 1$  V, b) Noise spectral density as a function of frequency

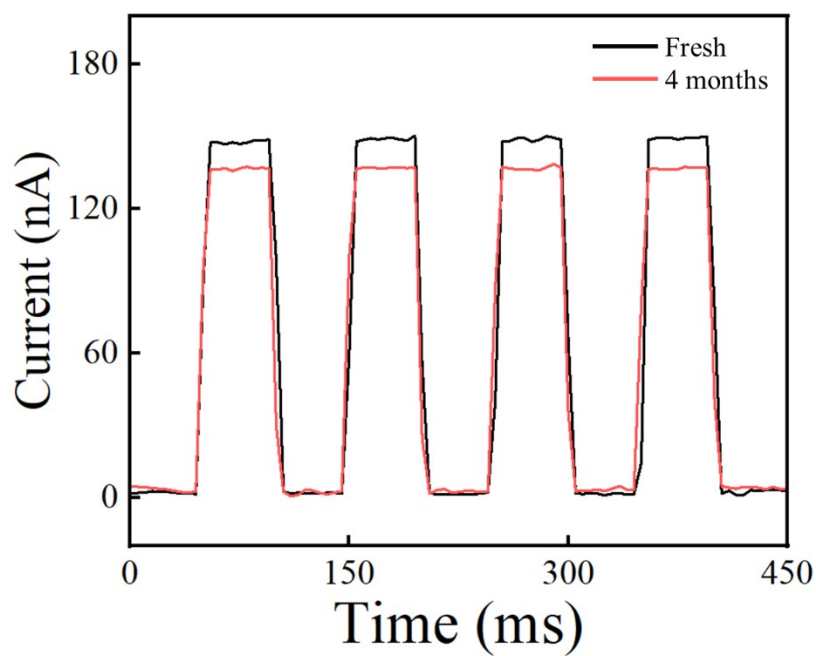

**Fig. S13** Long-term stability test of 2D GaN/Si PDs
